# Supplementary material for: High-Level γ-Glutamyl-Hydrolase (GGH) Expression is Linked to Poor Prognosis in ERG Negative Prostate Cancer
Source: MDPI journal article supplement (doi:10.3390/ijms18020286), 2017-01-29
Supplement: s1 [file s1]

**Table A1.** Association between GGH immunostaining results and prostate cancer phenotype in ERG fusion **negative** tumours.

| Parameter                             | n evaluable | GGH IHC result (%) |      |      | p value |
|---------------------------------------|-------------|--------------------|------|------|---------|
|                                       |             | Negative           | Low  | High |         |
| <b>All cancers</b>                    | 5,223       | 16.1               | 51.5 | 32.4 |         |
| <b>Tumour stage</b>                   |             |                    |      |      | 0.0016  |
| pT2                                   | 3,506       | 16.9               | 52.1 | 30.9 |         |
| pT3a                                  | 1,049       | 15.6               | 50.3 | 34.0 |         |
| pT3b-pT4                              | 652         | 12.1               | 50.5 | 37.4 |         |
| <b>Gleason grade</b>                  |             |                    |      |      | <0.0001 |
| ≤3+3                                  | 1,065       | 23.9               | 53.8 | 22.3 |         |
| 3+4                                   | 2,681       | 14.9               | 51.0 | 34.2 |         |
| 3+4 Tert.5                            | 239         | 13.0               | 56.5 | 30.5 |         |
| 4+3                                   | 482         | 13.3               | 51.5 | 35.3 |         |
| 4+3 Tert.5                            | 307         | 10.4               | 50.8 | 38.8 |         |
| ≥4+4                                  | 263         | 15.2               | 46.0 | 38.8 |         |
| <b>Lymph node metastasis</b>          |             |                    |      |      | 0.2423  |
| N0                                    | 3,049       | 14.2               | 51.1 | 34.7 |         |
| N+                                    | 290         | 13.4               | 46.9 | 39.7 |         |
| <b>Preoperative PSA level (ng/ml)</b> |             |                    |      |      | 0.0166  |
| <4                                    | 551         | 13.8               | 52.3 | 33.9 |         |
| 4-10                                  | 3,104       | 15.8               | 50.8 | 33.5 |         |
| 10-20                                 | 1,114       | 15.9               | 54.6 | 29.5 |         |
| >20                                   | 411         | 20.9               | 48.4 | 30.7 |         |
| <b>Surgical margin</b>                |             |                    |      |      | 0.7265  |
| Negative                              | 4,175       | 16.2               | 51.9 | 31.9 |         |
| Positive                              | 953         | 15.7               | 51.0 | 33.3 |         |
