# Supplementary material for: High-Level γ-Glutamyl-Hydrolase (GGH) Expression is Linked to Poor Prognosis in ERG Negative Prostate Cancer
Source: MDPI journal article supplement (doi:10.3390/ijms18020286), 2017-01-29
Supplement: s1 [file s1]

**Table A2.** Association between GGH immunostaining results and prostate cancer phenotype in ERG fusion **positive** tumours.

| Parameter                             | n evaluable | GGH (%)  |      |      | p value |
|---------------------------------------|-------------|----------|------|------|---------|
|                                       |             | Negative | Low  | High |         |
| <b>All cancers</b>                    | 4,049       | 5.9      | 46.9 | 47.2 |         |
| <b>Tumour stage</b>                   |             |          |      |      | 0.0104  |
| pT2                                   | 2,411       | 5.4      | 48.5 | 46.1 |         |
| pT3a                                  | 1,072       | 6.2      | 43.2 | 50.7 |         |
| pT3b-pT4                              | 551         | 8.0      | 46.8 | 45.2 |         |
| <b>Gleason grade</b>                  |             |          |      |      | 0.1031  |
| ≤3+3                                  | 842         | 7.8      | 47.5 | 44.7 |         |
| 3+4                                   | 2,176       | 5.3      | 47.4 | 47.2 |         |
| 3+4 Tert.5                            | 126         | 4.8      | 39.7 | 55.6 |         |
| 4+3                                   | 350         | 5.7      | 44.3 | 50.0 |         |
| 4+3 Tert.5                            | 218         | 4.6      | 46.3 | 49.1 |         |
| ≥4+4                                  | 135         | 8.9      | 49.6 | 41.5 |         |
| <b>Lymph node metastasis</b>          |             |          |      |      | <0.0001 |
| N0                                    | 2,317       | 5.4      | 44.3 | 50.3 |         |
| N+                                    | 259         | 11.6     | 53.7 | 34.7 |         |
| <b>Preoperative PSA level (ng/ml)</b> |             |          |      |      | 0.0015  |
| <4                                    | 551         | 4.2      | 48.6 | 47.2 |         |
| 4-10                                  | 2,473       | 5.5      | 45.9 | 48.6 |         |
| 10-20                                 | 731         | 7.3      | 47.3 | 45.4 |         |
| >20                                   | 249         | 10.4     | 51.8 | 37.8 |         |
| <b>Surgical margin</b>                |             |          |      |      | 0.5931  |
| Negative                              | 3,174       | 5.8      | 46.8 | 47.4 |         |
| Positive                              | 800         | 6.4      | 48.1 | 45.5 |         |
